# Supplementary figures and images for: Subcortical coding of predictable and unsupervised sound-context associations
Source: PubMed Central journal article supplement — Curr Res Neurobiol. 2023 Oct 2;5:100110. doi: 10.1016/j.crneur.2023.100110 (PMC10663128; doi:10.1016/j.crneur.2023.100110), 2023-10-02

Supplementary Fig. 1

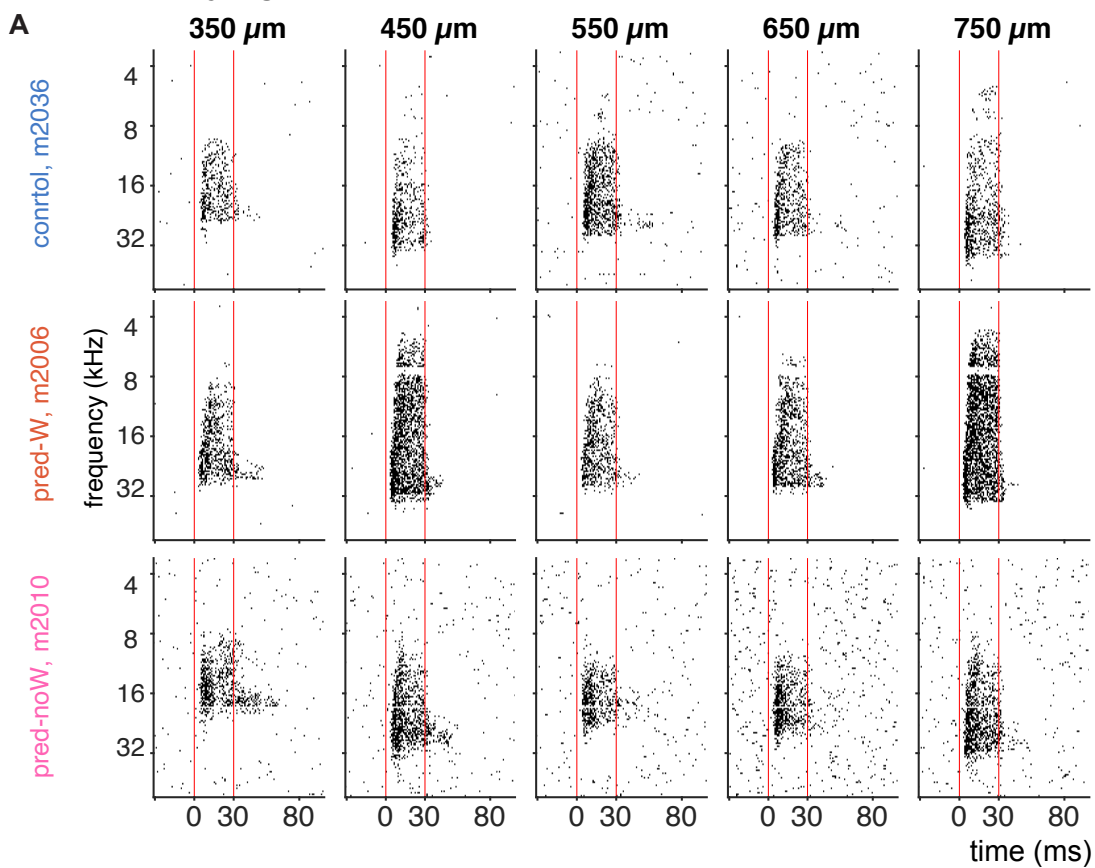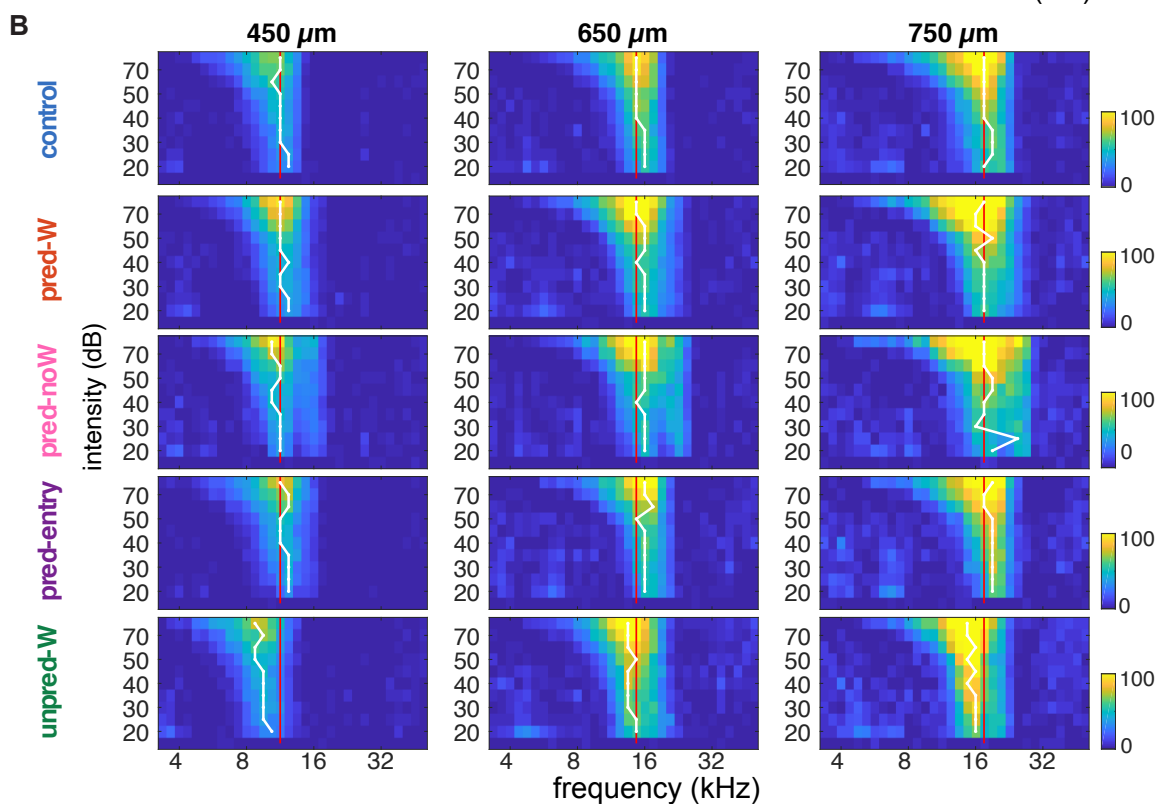

Supplementary Fig. 2

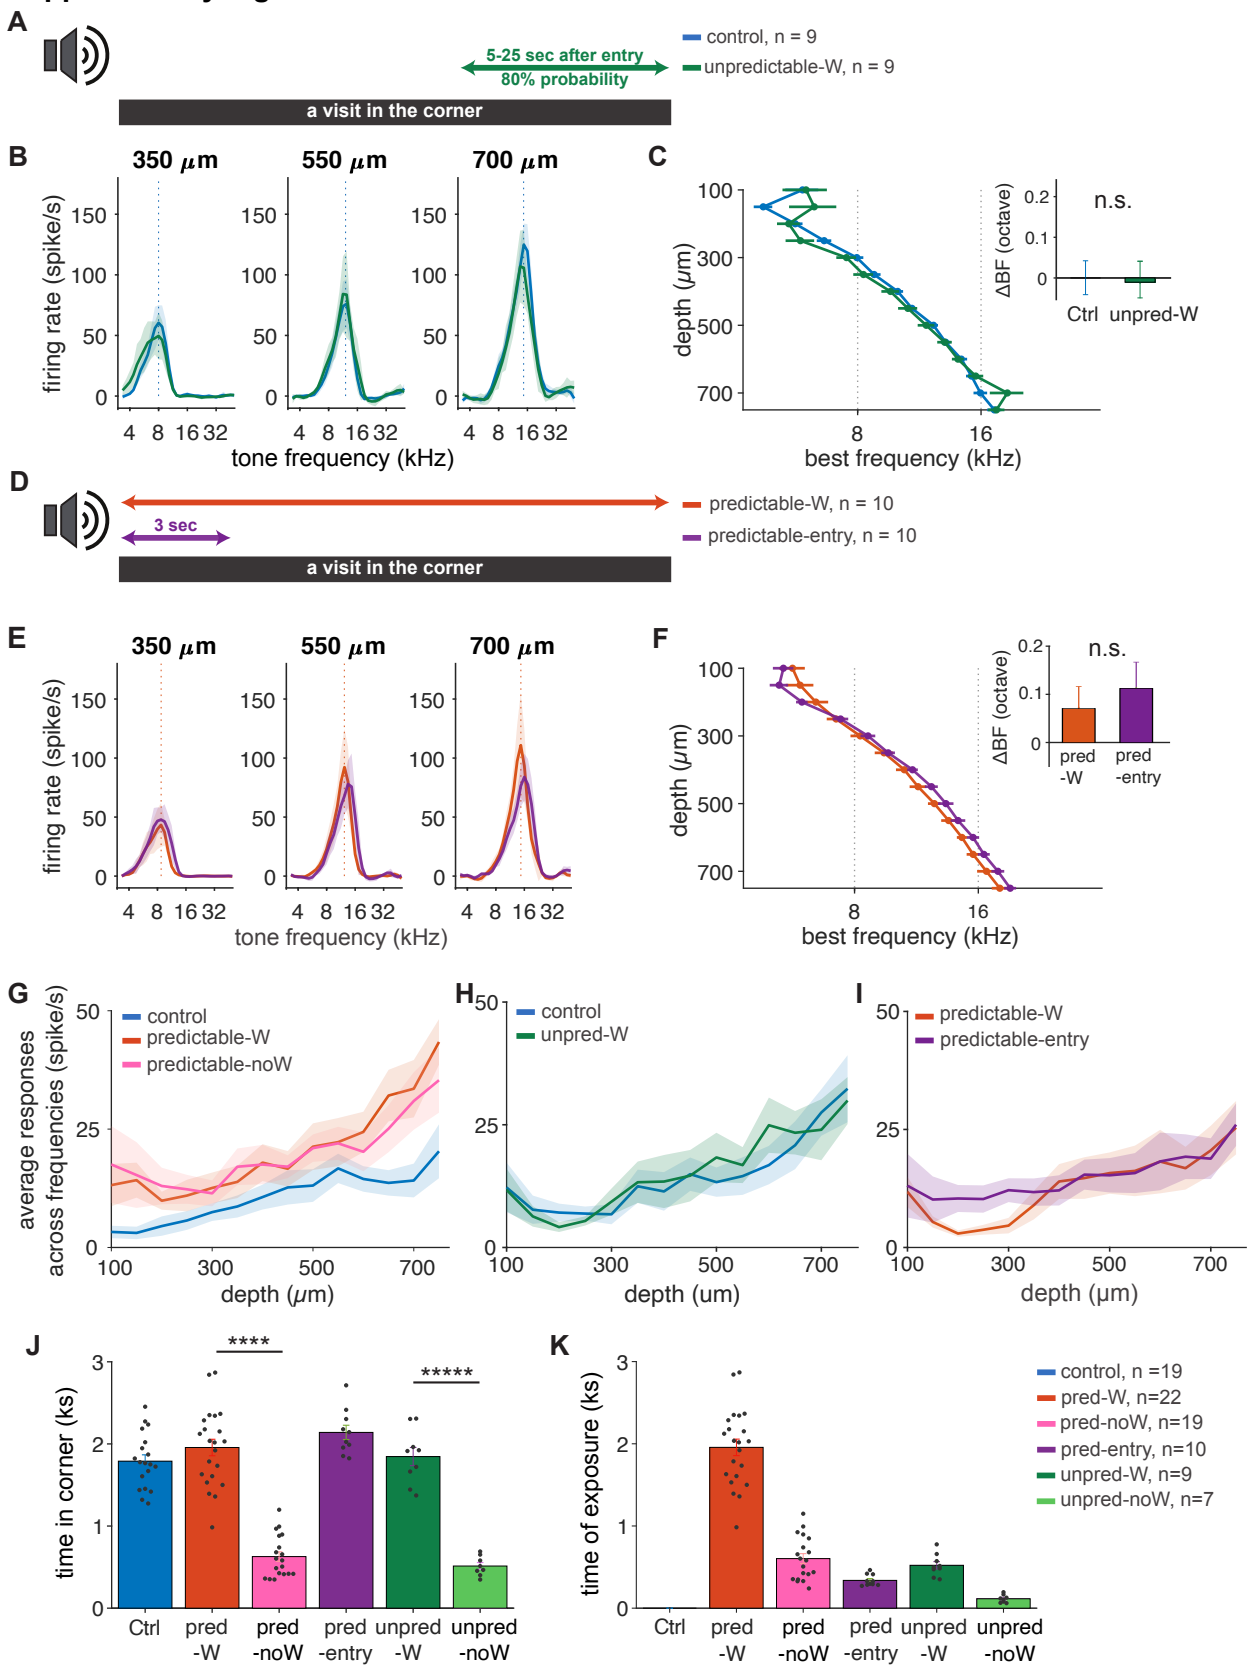

Supplementary Fig. 3

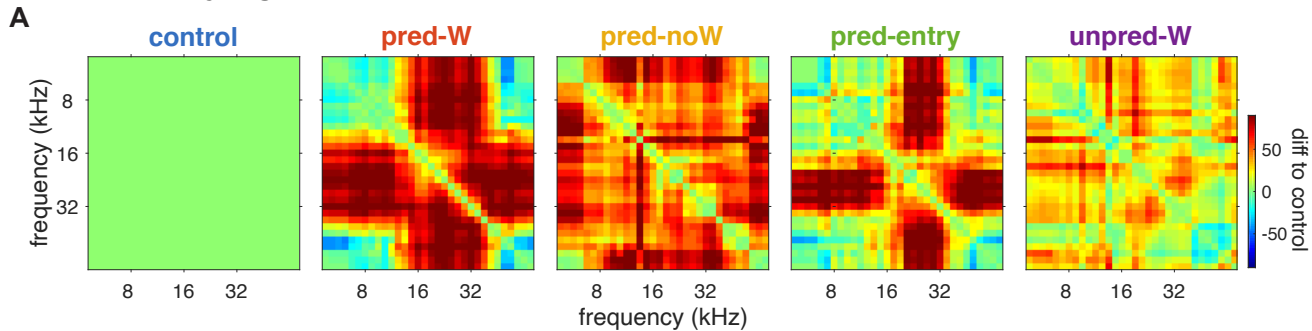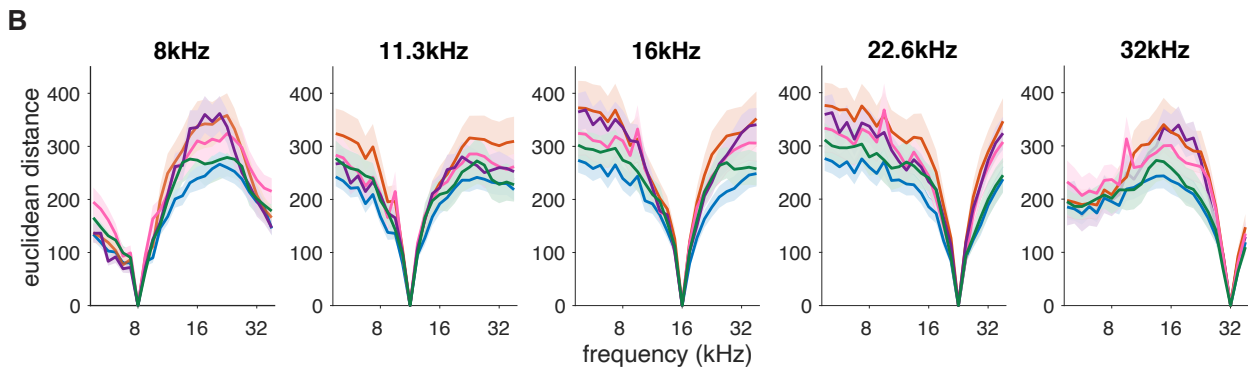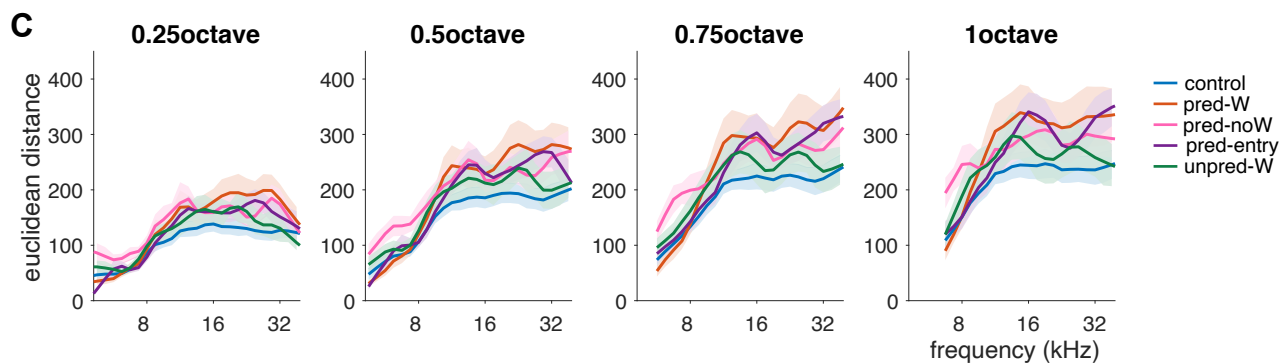

# Supplementary Fig. 4

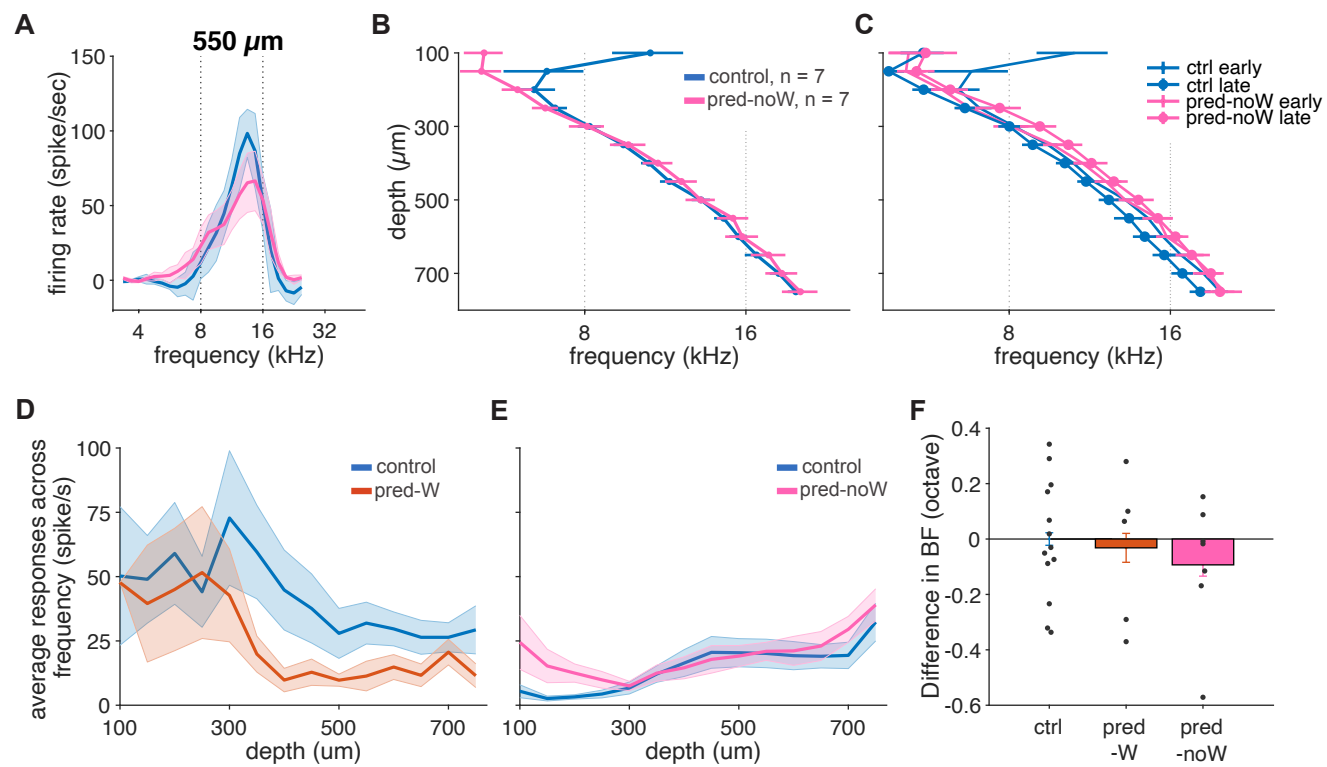

Supplement: mmc1.pdf [file mmc1.pdf]
